# Supplementary material for: Cell response and bone ingrowth to 3D printed Ti6Al4V scaffolds with Mg-incorporating sol–gel Ta2O5 coating
Source: Royal Society of Chemistry journal article supplement (doi:10.1039/d3ra05814j), 2023-01-01
Supplement: d3ra05814j1.pdf [file d3ra05814j1.pdf]

## Supplementary figures

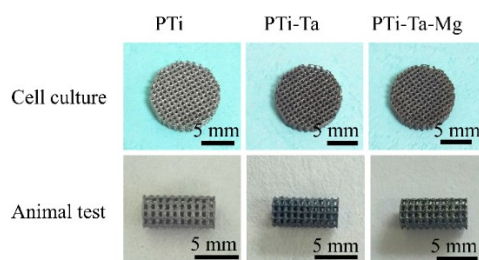

**Supplementary Fig. S1** 3D printing of Ti-based scaffolds

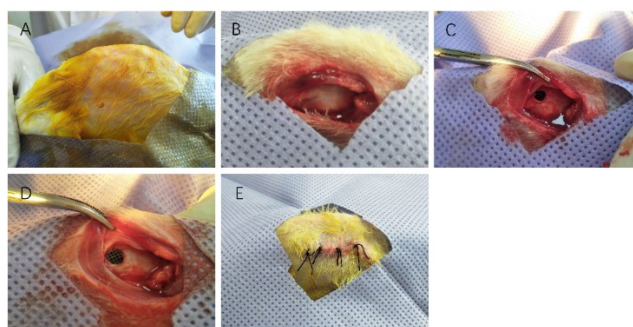

**Supplementary Fig. S2** The process of scaffolds implanted into rabbit femoral condyle: A: Determination of operation area after anesthesia; B: Exposure of the femoral condyle; C: Construction of the femoral condyle bone defect; D: Implantation of Ti-based scaffolds; E: Suture of the incision.

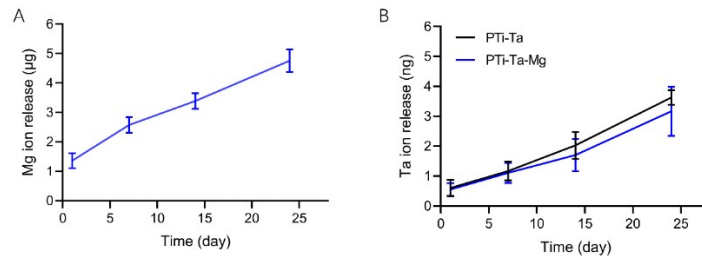

**Supplementary Fig. S3** The cumulative release curves of Mg ions from the sample PTi-Ta-Mg and Ta ions from the samples of PTi-Ta and PTi-Ta-Mg.

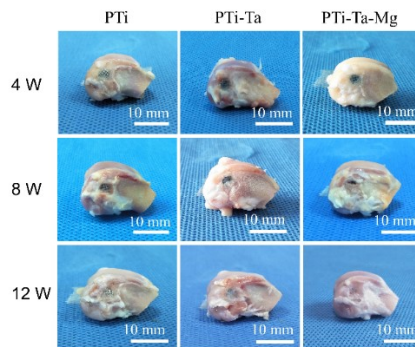

**Supplementary Fig. S4** The gross photographs of operated femoral condyle harvested at different times

## Supplementary table

**Supplementary Table S1** Sequences of primers for bone-related genes

| <b>Gene</b>    | <b>Forward primer (5'-3')</b> | <b>Reverse primer (5'-3')</b> |
|----------------|-------------------------------|-------------------------------|
| ALP            | G TTCAGTGCGGTTCAGACAA         | CTGCAAGGACATCGCTTATCA         |
| OPN            | TGGCTTTCAATGGACTTACTCG        | CAGCTTTACCACAAACACCC<br>G     |
| OCN            | TGATGCAAGCCTGACCTCC           | CCATAGCCCACGGCCAAAA           |
| Runx2          | CTCCCTGAACTCTGCACCAA          | TGCTGGGCTCTGAATCTGAAA         |
| $\beta$ -actin | GCACCACACCTTCTACAATG          | TGCTTGCTGATCCACATCTG          |
